# Supplementary material
Source: PubMed Central journal article supplement (PMC4248461)
Supplement: supp_WNL.0000000000001002_Supplemental_data.pdf [file supp_WNL.0000000000001002_Supplemental_data.pdf]

## Clinical spectrum of 4H leukodystrophy caused by *POLR3A* and *POLR3B* mutations

Nicole I Wolf MD<sup>1</sup>, Adeline Vanderver MD<sup>2</sup>, Rosalina M.L. van Spaendonk PhD<sup>3</sup>, Raphael Schiffmann MD<sup>4</sup>, Bernard Brais MD<sup>5</sup>, Marianna Bugiani MD<sup>6</sup>, Erik Siermans PhD<sup>3</sup>, Coriene Catsman-Berrevoets MD<sup>7</sup>, Johan M Kros MD<sup>8</sup>, Pedro Soares Pinto MD<sup>9</sup>, Daniela Pohl MD<sup>10</sup>, Sandya Tirupathi MD<sup>11</sup>, Petter Strømme MD<sup>12</sup>, Ton de Grauw MD<sup>13</sup>, Sébastien Fribourg PhD<sup>14</sup>, Michelle Demos MD<sup>15</sup>, Amy Pizzino MSc<sup>2</sup>, Sakkubai Naidu MD<sup>16</sup>, Kether Guerrero MSc<sup>17</sup>, 4H Research Group, Marjo S van der Knaap MD<sup>1,18</sup>, Geneviève Bernard MD<sup>17</sup>

1 Department of Child Neurology, VU University Medical Center, and Neuroscience Campus, Amsterdam, The Netherlands

2 Center for Genetic Medicine Research, Department of Neurology, Children's National Medical Center, Washington DC, USA

3 Department of Clinical Genetics, VU University Medical Center, Amsterdam, The Netherlands

4 Institute of Metabolic Disease, Baylor Research Institute, Dallas, Texas, USA

5 Departments of Neurology and Neurosurgery and Human Genetics, Montreal Neurological Institute, Quebec, Canada

6 Department of Pathology and Department of Child Neurology, VU University Medical Center, and Neuroscience Campus Amsterdam, Amsterdam, The Netherlands

7 Department of Paediatric Neurology, Erasmus University Hospital – Sophia Children's Hospital, Rotterdam, The Netherlands

8 Department of Pathology, Erasmus Medical Center, Rotterdam, The Netherlands

9 Neuroradiology Department, Centro Hospitalar do Porto, Porto, Portugal

10 Division of Neurology, Children's Hospital of Eastern Ontario, University of Ottawa, Ontario, Canada

11 Department of Paediatric Neurology, Royal Belfast Hospital for Sick Children, Belfast, UK

12 Department of Clinical Neurosciences for Children, Oslo University Hospital, Ullevål, and University of Oslo, Oslo, Norway

13 Department of Neurology, Cincinnati School Of Medicine and Cincinnati Children's Hospital Medical Center, Cincinnati, OH, USA

14 INSERM – IECB, Pessac, France

15 Department of Pediatric Neurology, University of British Columbia and British Columbia Children's Hospital, Vancouver, Canada

16 Kennedy Krieger Institute/Johns Hopkins Medical Institutions, Baltimore MD, USA

17 Departments of Pediatrics, Neurology and Neurosurgery, Division of Pediatric Neurology, Montreal Children's Hospital, McGill University Health Center, Montreal, Canada

18 Department of Functional Genomics, Center for Neurogenomics and Cognitive Research, VU University, Amsterdam, The Netherlands

### Supplementary Data

**Supplementary table e-1: Genetic findings in our patient cohort**

| Patient | Family | Consanguinity | Ethnicity                 | Gene          | Mutation 1 (gDNA) | Mutation 1 (protein) | Exon | Mutation 2 (gDNA) | Mutation 2 (protein) | Exon      | Published                                  |
|---------|--------|---------------|---------------------------|---------------|-------------------|----------------------|------|-------------------|----------------------|-----------|--------------------------------------------|
| 4H-1    | 4H-F1  | no            | FC                        | <i>POLR3A</i> | c.1674C>G         | p.Phe558Leu          | 13   | c.3742insACC      | p.1248insThr         | 28        | Bernard et al., 2010; Bernard et al., 2011 |
| 4H-2    | 4H-F2  | yes           | FC                        | <i>POLR3A</i> | c.2015G>A         | p.Gly672Glu          | 15   | c.2015G>A         | p.Gly672Glu          | 15        | Bernard et al., 2010; Bernard et al., 2011 |
| 4H-3    | 4H-F2  | yes           | FC                        | <i>POLR3A</i> | c.2015G>A         | p.Gly672Glu          | 15   | c.2015G>A         | p.Gly672Glu          | 15        | Bernard et al., 2010; Bernard et al., 2011 |
| 4H-4    | 4H-F2  | yes           | FC                        | <i>POLR3A</i> | c.2015G>A         | p.Gly672Glu          | 15   | c.2015G>A         | p.Gly672Glu          | 15        | Bernard et al., 2010; Bernard et al., 2011 |
| 4H-5    | 4H-F3  | suspected     | FC                        | <i>POLR3A</i> | c.2015G>A         | p.Gly672Glu          | 15   | c.2015G>A         | p.Gly672Glu          | 15        | Bernard et al., 2010; Bernard et al., 2011 |
| 4H-6    | 4H-F4  | yes           | FC                        | <i>POLR3A</i> | c.2015G>A         | p.Gly672Glu          | 15   | c.2015G>A         | p.Gly672Glu          | 15        | Bernard et al., 2011                       |
| 4H-7    | 4H-F5  | no            | Caucasian                 | <i>POLR3A</i> | c.2554A>G         | p.Met852Val          | 19   | c.2617-1G>A       | p.Arg873fs           | Intron 19 | Bernard et al., 2011, Timmons et al., 2006 |
| 4H-8    | 4H-F6  | no            | African-American          | <i>POLR3A</i> | c.1114G>A         | p.Asp372Asn          | 8    | c.2324A>T         | p.Asn775Ile          | 17        | Bernard et al., 2011                       |
| 4H-9    | 4H-F7  | no            | Caucasian                 | <i>POLR3A</i> | c.2830G>T         | p.Glu944*            | 21   | c.3013C>T         | p.Arg1005Cys         | 23        | Bernard et al., 2011, Timmons et al., 2006 |
| 4H-10   | 4H-F8  | no            | Caucasian                 | <i>POLR3A</i> | c.2554A>G         | p.Met852Val          | 19   | c.2617-1G>A       | p.Arg873fs           | Intron 19 | Bernard et al., 2011, Timmons et al., 2006 |
| 4H-11   | 4H-F9  | no            | Southeastern European     | <i>POLR3A</i> | c.3014G>A         | p.Arg1005His         | 23   | c.3991G>A         | p.Ala1331Thr         | 30        | Potic et al., 2011                         |
| 4H-12   | 4H-F10 | no            | Middle / Western European | <i>POLR3B</i> | c.1508C>A         | p.Thr503Lys          | 15   | c.1568A>T         | p.Val523Glu          | 15        | Tetreault et al., 2011                     |

| Patient | Family | Consanguinity | Ethnicity             | Gene          | Mutation 1 (gDNA)  | Mutation 1 (protein) | Exon      | Mutation 2 (gDNA) | Mutation 2 (protein) | Exon      | Published              |
|---------|--------|---------------|-----------------------|---------------|--------------------|----------------------|-----------|-------------------|----------------------|-----------|------------------------|
| 4H-13   | 4H-F11 | no            | Caucasian             | <i>POLR3B</i> | c.1533delT         | p.Ile511fs           | 15        | c.1568A>T         | p.Val523Glu          | 15        | Tetreault et al., 2011 |
| 4H-14   | 4H-F12 | no            | Caucasian             | <i>POLR3B</i> | c.1568A>T          | p.Val523Glu          | 15        | c.2686A>T         | p.Lys896*            | 23        | Tetreault et al., 2011 |
| 4H-15   | 4H-F13 | suspected     | FC                    | <i>POLR3A</i> | c.496G>A           | p.Val166Ile          | 5         | c.496G>A          | p.Val166Ile          | 5         | Daoud et al., 2013     |
| 4H-16   | 4H-F13 | suspected     | FC                    | <i>POLR3A</i> | c.496G>A           | p.Val166Ile          | 5         | c.496G>A          | p.Val166Ile          | 5         | Daoud et al., 2013     |
| 4H-17   | 4H-F14 | yes           | Mediterranean         | <i>POLR3A</i> | c.2011T>C          | p.Trp671Arg          | 15        | c.2011T>C         | p.Trp671Arg          | 15        | Daoud et al., 2013     |
| 4H-18   | 4H-F14 | yes           | Mediterranean         | <i>POLR3A</i> | c.2011T>C          | p.Trp671Arg          | 15        | c.2011T>C         | p.Trp671Arg          | 15        | Daoud et al., 2013     |
| 4H-19   | 4H-F15 | no            | Caucasian             | <i>POLR3A</i> | c.1741insA         | p.Val581fs           | 13        | c.1804A>C         | p.Ser602Arg          | 14        | Daoud et al., 2013     |
| 4H-20   | 4H-F16 | no            | Caucasian             | <i>POLR3A</i> | c.1160C>G          | p.Ala387Gly          | 8         | c.3781G>A         | p.Glu1261Lys         | 29        | Daoud et al., 2013     |
| 4H-21   | 4H-F17 | no            | Malaysian / Caucasian | <i>POLR3A</i> | c.1302insA         | p.Tyr434*            | 10        | c.2554A>G         | p.Met852Val          | 19        | Daoud et al., 2013     |
| 4H-22   | 4H-F18 | no            | Hispanic              | <i>POLR3A</i> | c.272C>T           | p.Pro91Leu           | 3         | c.3013C>T         | p.Arg1005Cys         | 23        | Daoud et al., 2013     |
| 4H-23   | 4H-F19 | no            | Caucasian             | <i>POLR3B</i> | c.1568T>A          | p.Val523Glu          | 15        | c.2084-6A>G       | p.Gly695fs           | Intron 19 | Daoud et al., 2013     |
| 4H-24   | 4H-F20 | no            | North European        | <i>POLR3B</i> | c.1568T>A          | p.Val523Glu          | 15        | c.2084-6A>G       | p.Gly695fs           | Intron 19 | Daoud et al., 2013     |
| 4H-25   | 4H-F21 | no            | Middle European       | <i>POLR3B</i> | c.1568T>A          | p.Val523Glu          | 15        | c.1579T>C         | p.Cys527Arg          | 15        | Daoud et al., 2013     |
| 4H-26   | 4H-F22 | no            | North European        | <i>POLR3B</i> | c.1568T>A          | p.Val523Glu          | 15        | c.2817+30T>A      |                      | Intron 24 | Daoud et al., 2013     |
| 4H-27   | 4H-F23 | no            | Caucasian             | <i>POLR3B</i> | c.1324C>T          | p.Arg442Cys          | 14        | c.1568T>A         | p.Val523Glu          | 15        | Daoud et al., 2013     |
| 4H-28   | 4H-F24 | no            | Caucasian             | <i>POLR3B</i> | c.312G>T           | p.Leu104Phe          | 6         | c.2570+1G>A       | p.Gly818fs           | 22        | Daoud et al., 2013     |
| 4H-29   | 4H-F25 | no            | North European        | <i>POLR3B</i> | c.802A>G           | p.Ser268Gly          | 10        | c.1568T>A         | p.Val523Glu          | 15        | Daoud et al., 2013     |
| 4H-30   | 4H-F26 | no            | Caucasian             | <i>POLR3A</i> | c.2821A>C          | p.Ser941Arg          | 21        | c.3407G>A         | p.Arg1136Gln         | 26        |                        |
| 4H-31   | 4H-F27 | no            | Caucasian             | <i>POLR3A</i> | c.1186G>T          | p.Val396Leu          | 9         | c.2015G>A         | p.Gly672Glu          | 15        |                        |
| 4H-32   | 4H-F28 | no            | Hispanic              | <i>POLR3A</i> | c.364_366delAAG    | p.Lys122del          | 4         | c.1930G>A         | p.Glu644Lys          | 15        |                        |
| 4H-33   | 4H-F29 | no            | Caucasian             | <i>POLR3A</i> | c.1930G>A          | p.Glu644Lys          | 15        | c.1935G>C         | p.Leu645Phe          | 15        |                        |
| 4H-34   | 4H-F30 | no            | Hispanic              | <i>POLR3B</i> | c.1464+1G>A        |                      | Intron 14 | c.1568T>A         | p.Val523Glu          | 15        |                        |
| 4H-35   | 4H-F31 | no            | East European         | <i>POLR3B</i> | c.1568T>A          | p.Val523Glu          | 15        | c.2084-6A>G       | p.Gly695fs           | Intron 19 |                        |
| 4H-36   | 4H-F32 | no            | N/A                   | <i>POLR3A</i> | c.550_553delinsAAT | p.Lys184fs           | 5         | c.3014G>A         | p.Arg1005His         | 23        |                        |

| Patient | Family | Consanguinity | Ethnicity        | Gene          | Mutation 1 (gDNA) | Mutation 1 (protein) | Exon      | Mutation 2 (gDNA) | Mutation 2 (protein) | Exon      | Published            |
|---------|--------|---------------|------------------|---------------|-------------------|----------------------|-----------|-------------------|----------------------|-----------|----------------------|
| 4H-37   | 4H-F33 | no            | African-American | <i>POLR3B</i> | c.1346T>C         | p.Leu449Pro          | 14        | c.2899A>C         | p.Ser967Arg          | 25        |                      |
| 4H-38   | 4H-F33 | no            | African-American | <i>POLR3B</i> | c.1346T>C         | p.Leu449Pro          | 14        | c.2899A>C         | p.Ser967Arg          | 25        |                      |
| 4H-F39  | 4H-F34 | no            | Caucasian        | <i>POLR3B</i> | c.1568T>A         | p.Val523Glu          | 15        | not found         |                      |           |                      |
| 4H-40   | 4H-F35 | no            | Caucasian        | <i>POLR3B</i> | c.2918G>T         | p.Cys973Phe          | 25        | c.2920G>T         | p.Glu974*            | 25        |                      |
| 4H-41   | 4H-F36 | no            | Mediterranean    | <i>POLR3A</i> | c.3014G>A         | p.Arg1005His         | 23        | c.3781G>A         | p.Glu1261Lys         | 29        |                      |
| 4H-42   | 4H-F37 | no            | FC               | <i>POLR3A</i> | c.2015G>A         | p.Gly672Glu          | 15        | c.3718G>A         | p.Gly1240Ser         | 28        |                      |
| 4H-43   | 4H-F38 | no            | FC               | <i>POLR3A</i> | c.1674C>G         | p.Phe558Leu          | 13        | c.2015G>A         | p.Gly672Glu          | 15        |                      |
| 4H-44   | 4H-F39 | yes           | Caucasian        | <i>POLR3B</i> | c.1568T>A         | p.Val523Glu          | 15        | c.1568T>A         | p.Val523Glu          | 15        |                      |
| 4H-45   | 4H-F39 | yes           | Caucasian        | <i>POLR3B</i> | c.1568T>A         | p.Val523Glu          | 15        | c.1568T>A         | p.Val523Glu          | 15        |                      |
| 4H-46   | 4H-F40 | no            | Western European | <i>POLR3A</i> | c.169G>A          | p.Asp57Asn           | 2         | c.2098A>T         | p.Ile700Phe          | 16        | Timmons et al., 2006 |
| 4H-47   | 4H-F41 | no            | Western European | <i>POLR3B</i> | c.1568T>A         | p.Val523Glu          | 15        | c.2707delC        | p.Gln903fs           | 23        |                      |
| 4H-48   | 4H-F42 | no            | Middle European  | <i>POLR3A</i> | c.1433C>G         | p.Ala478Gly          | 11        | c.2045G>A         | p.Arg682Gln          | 15        | Wolf et al., 2005    |
| 4H-49   | 4H-F43 | no            | Middle European  | <i>POLR3B</i> | c.1568T>A         | p.Val523Glu          | 15        | c.2084-6A>G       | p.Gly695fs           | Intron 19 | Wolf et al., 2007    |
| 4H-50   | 4H-F44 | no            | Middle European  | <i>POLR3B</i> | c.1568T>A         | p.Val523Glu          | 15        | c.1900G>A         | p.Asp634Asn          | 18        | Wolf et al., 2005    |
| 4H-51   | 4H-F45 | no            | Middle European  | <i>POLR3B</i> | c.1568T>A         | p.Val523Glu          | 15        | c.3352C>T         | p.Gln1118*           | 28        | Wolf et al., 2005    |
| 4H-52   | 4H-F46 | no            | Middle European  | <i>POLR3B</i> | c.1568T>A         | p.Val523Glu          | 15        | c.2084-6A>G       | p.Gly695fs           | Intron 19 |                      |
| 4H-53   | 4H-F47 | no            | Middle European  | <i>POLR3B</i> | c.967-15A>G       |                      | Intron 11 | c.1568T>A         | p.Val523Glu          | 15        | Wolf et al., 2005    |
| 4H-54   | 4H-F48 | no            | Caucasian        | <i>POLR3B</i> | c.1324C>T         | p.Arg442Cys          | 14        | c.1568T>A         | p.Val523Glu          | 15        | Wolf et al., 2007    |
| 4H-55   | 4H-F49 | no            | Western European | <i>POLR3B</i> | c.1325G>T         | p.Arg442Leu          | 14        | c.1568T>A         | p.Val523Glu          | 15        |                      |
| 4H-56   | 4H-F49 | no            | Western European | <i>POLR3B</i> | c.1325G>T         | p.Arg442Leu          | 14        | c.1568T>A         | p.Val523Glu          | 15        |                      |
| 4H-57   | 4H-F50 | no            | Western European | <i>POLR3B</i> | c.1788C>A         | p.Tyr596*            | 17        | c.2180T>C         | p.Leu727Ser          | 20        |                      |
| 4H-58   | 4H-F51 | no            | Syrian           | <i>POLR3B</i> | c.3005T>C         | p.Ile1002Thr         | 26        | c.3005T>C         | p.Ile1002Thr         | 26        |                      |
| 4H-59   | 4H-F52 | no            | Middle European  | <i>POLR3B</i> | c.1112_1113delTT  | p.Leu371fs           | 13        | c.1568T>A         | p.Val523Glu          | 15        | Wolf et al., 2007    |
| 4H-60   | 4H-F53 | no            | Caucasian        | <i>POLR3B</i> | c.1568T>A         | p.Val523Glu          | 15        | c.2570+1G>A       | p.Gly818fs           | Intron 22 |                      |
| 4H-61   | 4H-F54 | no            | Caucasian        | <i>POLR3B</i> | c.1263+2T>C       |                      | Intron 13 | c.1568T>A         | p.Val523Glu          | 15        |                      |

| Patient | Family | Consanguinity | Ethnicity        | Gene          | Mutation 1 (gDNA) | Mutation 1 (protein) | Exon      | Mutation 2 (gDNA) | Mutation 2 (protein) | Exon      | Patient                    |
|---------|--------|---------------|------------------|---------------|-------------------|----------------------|-----------|-------------------|----------------------|-----------|----------------------------|
| 4H-62   | 4H-F55 | no            | Western European | <i>POLR3B</i> | c.832_833dup      | p.Thr279fs           | 10        | c.1568T>A         | p.Val523Glu          | 15        |                            |
| 4H-63   | 4H-F56 | no            | Caucasian        | <i>POLR3B</i> | c.1018C>T         | p.Arg340*            | 12        | c.1568T>A         | p.Val523Glu          | 15        |                            |
| 4H-64   | 4H-F57 | no            | Caucasian        | <i>POLR3B</i> | c.1568T>A         | p.Val523Glu          | 15        | not found         |                      |           |                            |
| 4H-65   | 4H-F57 | no            | Caucasian        | <i>POLR3B</i> | c.1568T>A         | p.Val523Glu          | 15        | not found         |                      |           |                            |
| 4H-66   | 4H-F58 | no            | Mediterranean    | <i>POLR3A</i> | c.441dupT         | p.Asp148*            | 4         | c.2554A>G         | p.Met852Val          | 19        |                            |
| 4H-67   | 4H-F59 | no            | Mediterranean    | <i>POLR3A</i> | c.1795C>A         | p.Gln599Lys          | 14        | c.3718G>A         | p.Gly1240Ser         | 28        |                            |
| 4H-68   | 4H-F60 | no            | Middle European  | <i>POLR3B</i> | c.1568T>A         | p.Val523Glu          | 15        | c.2570+1G>A       | p.Gly818fs           | Intron 22 |                            |
| 4H-69   | 4H-F61 | no            | Western European | <i>POLR3B</i> | c.1263+2T>C       |                      | Intron 13 | c.1568T>A         | p.Val523Glu          | 15        |                            |
| 4H-70   | 4H-F62 | no            | Middle European  | <i>POLR3B</i> | c.1999G>A         | p.Val667Met          | 19        | c.2084-6A>G       | p.Gly695fs           | Intron 19 |                            |
| 4H-71   | 4H-F63 | no            | Middle European  | <i>POLR3B</i> | c.1568T>A         | p.Val523Glu          | 15        | c.2570+1G>A       | p.Gly818fs           | Intron 22 |                            |
| 4H-72   | 4H-F64 | no            | North European   | <i>POLR3B</i> | c.1568T>A         | p.Val523Glu          | 15        | c.1857-12A>G      |                      | Intron 17 |                            |
| 4H-73   | 4H-F65 | no            | Mediterranean    | <i>POLR3B</i> | c.1568T>A         | p.Val523Glu          | 15        | c.2683G>A         | p.Asp895Asn          | 23        |                            |
| 4H-74   | 4H-F65 | no            | Mediterranean    | <i>POLR3B</i> | c.1568T>A         | p.Val523Glu          | 15        | c.2683G>A         | p.Asp895Asn          | 23        |                            |
| 4H-75   | 4H-F66 | no            | Mediterranean    | <i>POLR3A</i> | c.2005C>G         | p.Arg669Gly          | 15        | c.2618G>A         | p.Arg873Gln          | 20        | Wolf et al., 2007          |
| 4H-76   | 4H-F67 | no            | Caucasian        | <i>POLR3B</i> | c.1263+2T>C       |                      | Intron 13 | c.1568T>A         | p.Val523Glu          | 15        |                            |
| 4H-77   | 4H-F68 | yes           | Mediterranean    | <i>POLR3A</i> | c.2547C>G         | p.Phe849Leu          | 19        | c.2547C>G         | p.Phe849Leu          | 19        | Vazquez-Lopez et al., 2008 |
| 4H-78   | 4H-F69 | no            | Mixed European   | <i>POLR3B</i> | c.3008A>G         | p.Tyr1003Cys         | 26        | c.3008A>G         | p.Tyr1003Cys         | 26        |                            |
| 4H-79   | 4H-F70 | no            | Caucasian        | <i>POLR3A</i> | c.2039T>C         | p.Met680Thr          | 15        | c.2660A>T         | p.Asp887Val          | 20        |                            |
| 4H-80   | 4H-F70 | no            | Caucasian        | <i>POLR3A</i> | c.2039T>C         | p.Met680Thr          | 15        | c.2660A>T         | p.Asp887Val          | 20        |                            |
| 4H-81   | 4H-F71 | no            | Caucasian        | <i>POLR3B</i> | c.308G>A          | p.Arg103His          | 6         | c.1568T>A         | p.Val523Glu          | 15        |                            |
| 4H-82   | 4H-F72 | no            | Caucasian        | <i>POLR3B</i> | c.1325G>T         | p.Arg442Leu          | 14        | c.1568T>A         | p.Val523Glu          | 15        |                            |
| 4H-83   | 4H-F73 | no            | Caucasian        | <i>POLR3B</i> | c.1857-12A>G      |                      | Intron 17 | c.1568T>A         | p.Val523Glu          | 15        |                            |
| 4H-84   | 4H-F74 | no            | Western European | <i>POLR3B</i> | c.1101+1G>C       |                      | Intron 12 | c.1568T>A         | p.Val523Glu          | 15        |                            |
| 4H-85   | 4H-F75 | no            | Western European | <i>POLR3A</i> | c.2988+1G>T       |                      | Intron 21 | c.3013C>T         | p.Arg1005Cys         | 23        |                            |
| 4H-86   | 4H-F76 | no            | Western European | <i>POLR3A</i> | c.1930G>A         | p.Glu644Lys          | 15        | c.2350G>A         | p.Gly784Ser          | 17        |                            |
| 4H-87   | 4H-F77 | yes           | Mediterranean    | <i>POLR3B</i> | c.79T>C           | p.Trp27Arg           | 2         | c.79T>C           | p.Trp27Arg           | 2         |                            |

| Patient | Family | Consanguinity | Ethnicity        | Gene          | Mutation 1 (gDNA) | Mutation 1 (protein) | Exon     | Mutation 2 (gDNA) | Mutation 2 (protein) | Exon      | Patient                             |
|---------|--------|---------------|------------------|---------------|-------------------|----------------------|----------|-------------------|----------------------|-----------|-------------------------------------|
| 4H-88   | 4H-F77 | yes           | Mediterranean    | <i>POLR3B</i> | c.79T>C           | p.Trp27Arg           | 2        | c.79T>C           | p.Trp27Arg           | 2         |                                     |
| 4H-89   | 4H-F78 | no            | Mediterranean    | <i>POLR3A</i> | c.2011T>C         | p.Trp671Arg          | 15       | c.2810A>T         | p.Glu937Val          | 21        |                                     |
| 4H-90   | 4H-F79 | no            | Middle European  | <i>POLR3A</i> | c.1658C>T         | p.Thr553Ile          | 13       | c.2554A>G         | p.Met852Val          | 19        |                                     |
| 4H-91   | 4H-F80 | yes           | Mediterranean    | <i>POLR3A</i> | c.1797G>C         | p.Gln599His          | 14       | c.1797G>C         | p.Gln599His          | 14        | Bekiesinska-Figatowska et al., 2010 |
| 4H-92   | 4H-F80 | yes           | Mediterranean    | <i>POLR3A</i> | c.1797G>C         | p.Gln599His          | 14       | c.1797G>C         | p.Gln599His          | 14        |                                     |
| 4H-93   | 4H-F81 | no            | Western European | <i>POLR3B</i> | c.303+1G>A        |                      | Intron 5 | c.1568T>A         | p.Val523Glu          | 15        | Ozgen et al., 2005                  |
| 4H-94   | 4H-F82 | no            | Western European | <i>POLR3B</i> | c.1477G>T         | p.Val493Phe          | 15       | not found         |                      |           |                                     |
| 4H-95   | 4H-F83 | no            | Middle European  | <i>POLR3B</i> | c.1568T>A         | p.Val523Glu          | 15       | c.2083+1G>A       |                      | Intron 19 |                                     |
| 4H-96   | 4H-F84 | no            | Middle European  | <i>POLR3B</i> | c.1568T>A         | p.Val523Glu          | 15       | c.3035T>C         | p.Leu1012Pro         | 26        |                                     |
| 4H-97   | 4H-F85 | no            | Mediterranean    | <i>POLR3A</i> | c.2542T>C         | p.Phe848Leu          | 19       | c.2542T>C         | p.Phe848Leu          | 19        |                                     |
| 4H-98   | 4H-F86 | no            | North European   | <i>POLR3B</i> | c.1568T>A         | p.Val523Glu          | 15       | c.3349C>G         | p.Leu1117Val         | 28        |                                     |
| 4H-99   | 4H-F87 | no            | North European   | <i>POLR3B</i> | c.1568T>A         | p.Val523Glu          | 15       | c.2190delT        | p.Phe730fs           | 20        |                                     |
| 4H-100  | 4H-F88 | no            | Mediterranean    | <i>POLR3A</i> | c.2015G>A         | p.Gly672Glu          | 15       | not found         |                      |           |                                     |
| 4H-101  | 4H-F89 | no            | East European    | <i>POLR3B</i> | c.3071C>T         | p.Ala1024Val         | 26       | c.2944A>G         | p.Asn982Asp          | 25        |                                     |
| 4H-102  | 4H-F90 | no            | Middle European  | <i>POLR3B</i> | c.1253C>T         | p.Ala418Val          | 13       | c.1253C>T         | p.Ala418Val          | 13        |                                     |
| 4H-103  | 4H-F91 | no            | Middle European  | <i>POLR3B</i> | c.1568T>A         | p.Val523Glu          | 15       | c.2570+1G>A       | p.Gly818fs           | Intron 22 |                                     |
| 4H-104  | 4H-F92 | no            | Caucasian        | <i>POLR3B</i> | c.986G>A          | p.Arg329Gln          | 12       | c.1568T>A         | p.Val523Glu          | 15        |                                     |
| 4H-105  | 4H-F92 | no            | Caucasian        | <i>POLR3B</i> | c.986G>A          | p.Arg329Gln          | 12       | c.1568T>A         | p.Val523Glu          | 15        |                                     |

## Supplementary figure e-1: Mutations in *POLR3A* and *POLR3B*

### *POLR3A*

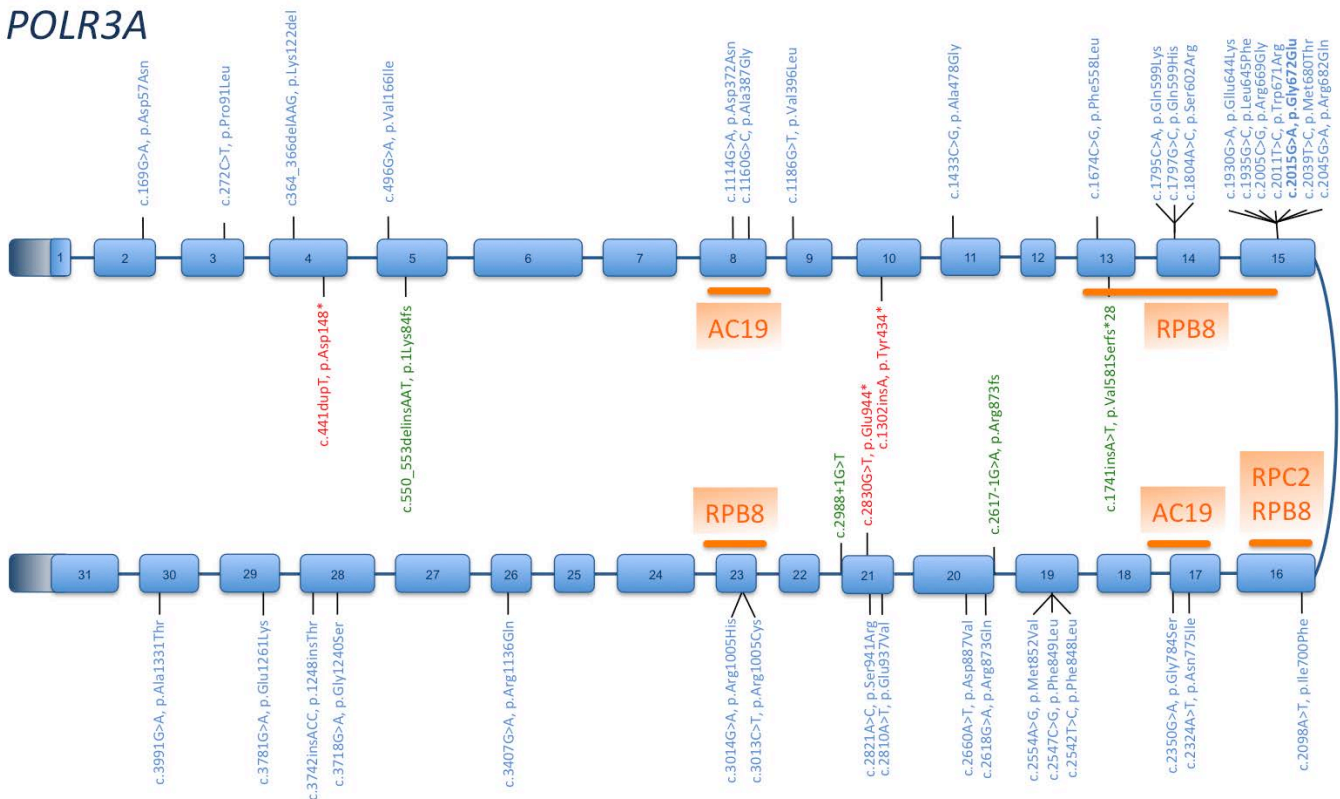

### *POLR3B*

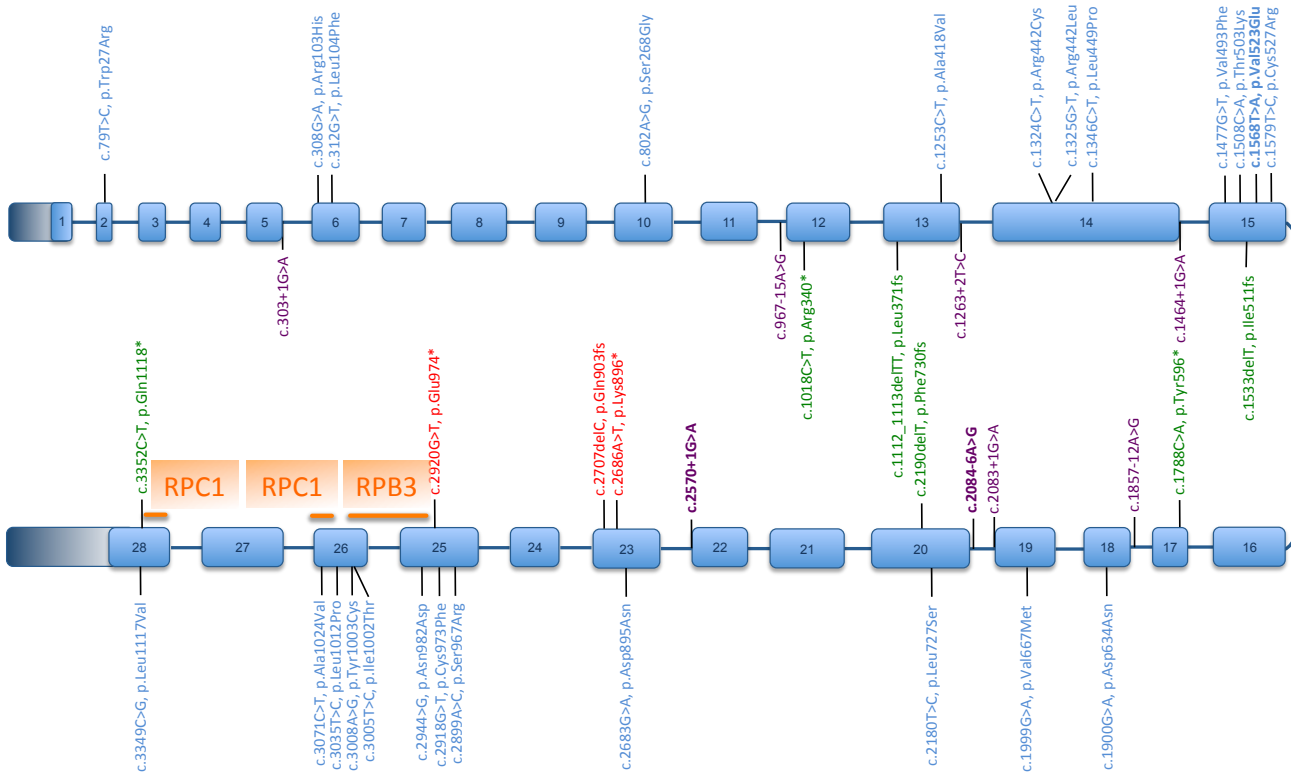

Localisation of the *POLR3A* (A) and *POLR3B* (B) mutations of our cohort in the gene structure. Mutations found in more than one unrelated patients are depicted in bold.

**Supplemental figure e-2: MRI findings**

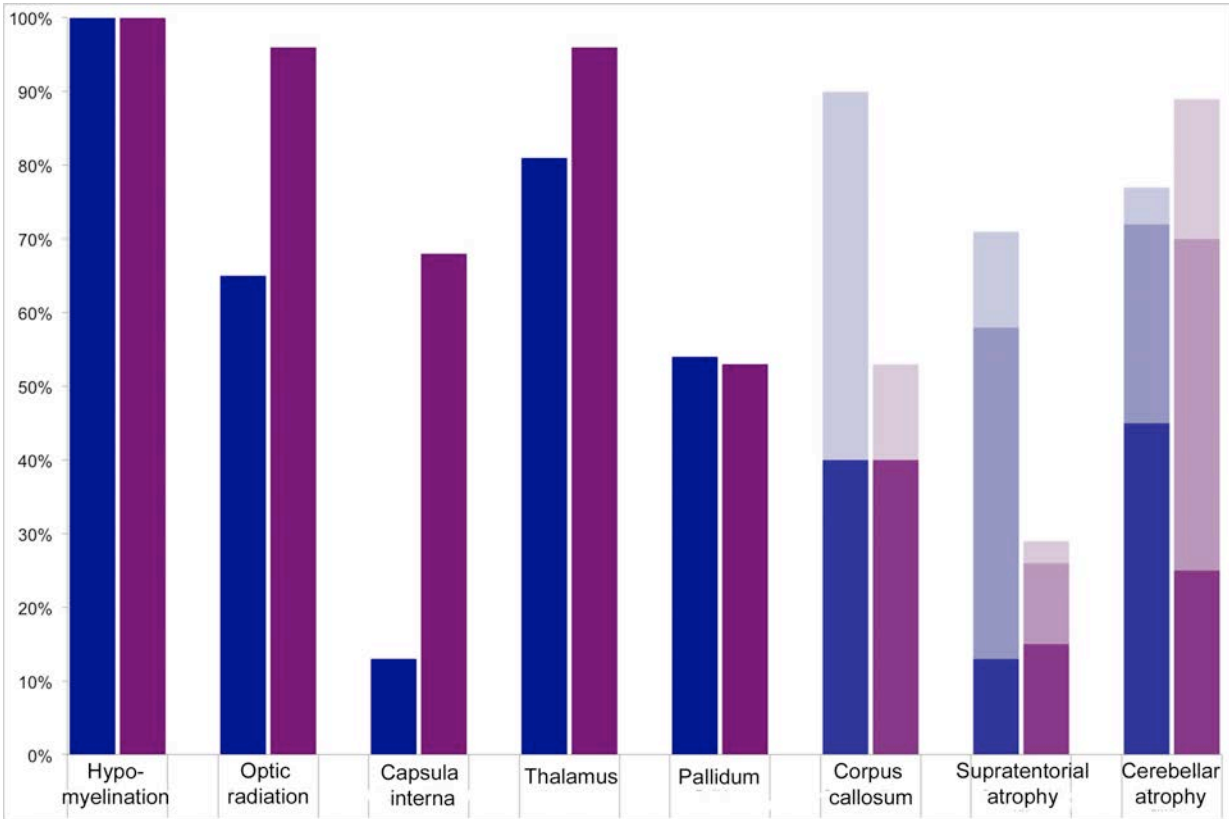

MRI findings in patients with mutations in POLR3A (blue shades) and POLR3B (violet shades). Optic radiation: preserved myelination in optic radiation. Capsula interna: partly myelinated internal capsule. Thalamus: relative T2 hypointense signal of ventrolateral thalamus. Globus pallidus: relative T2 hypointense signal of globus pallidus. Corpus callosum: decreased volume of the corpus callosum. Last three items (corpus callosum and supratentorial / cerebellar atrophy): dark shades – mild, medium shades – moderate, light shades – severe.



Supplementary figure e-2: Histopathological findings

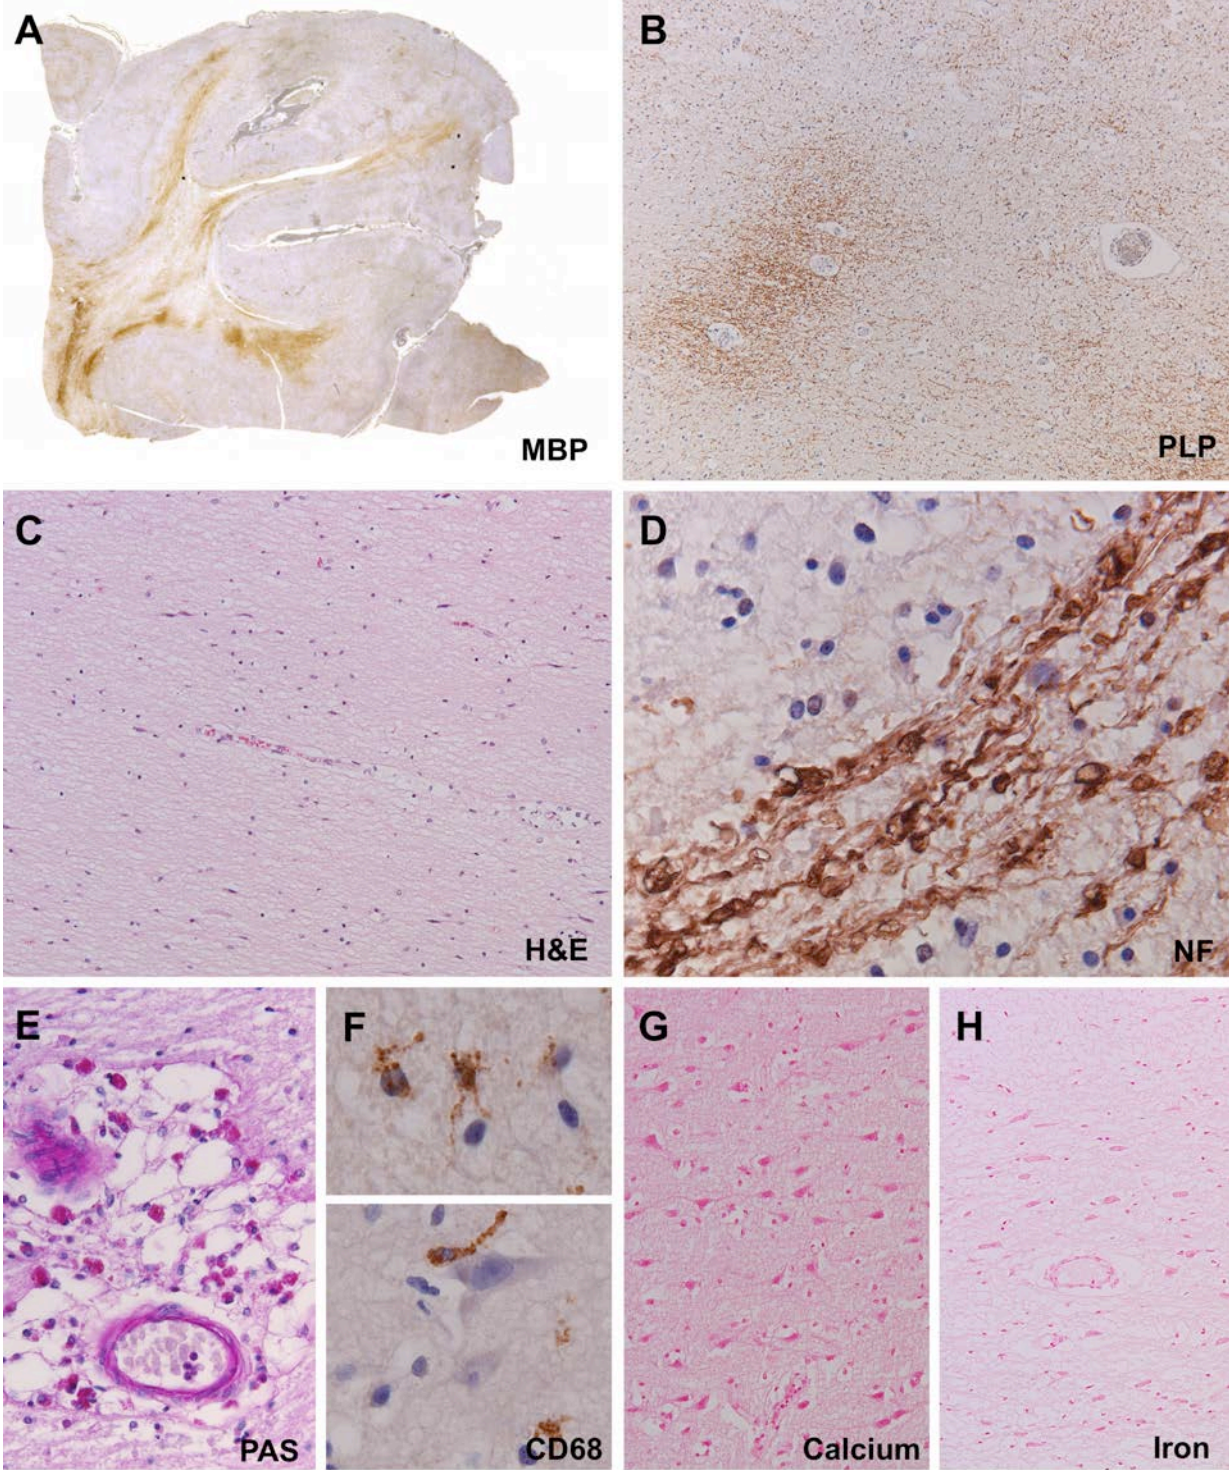



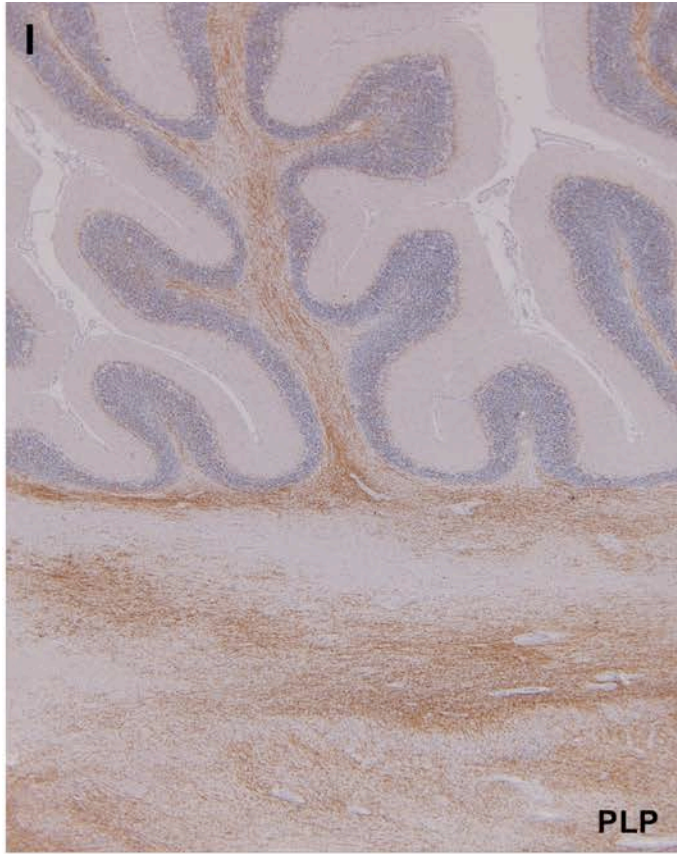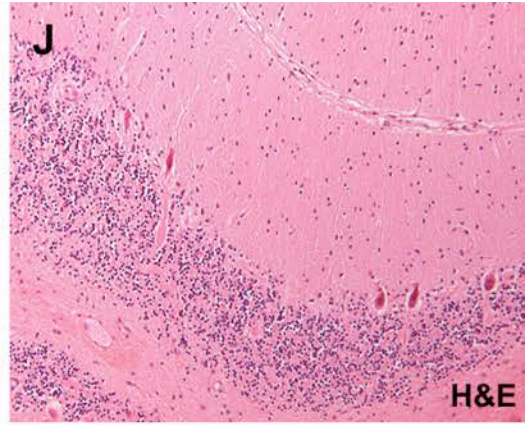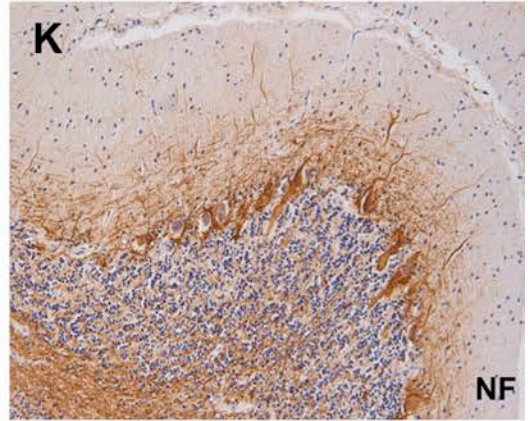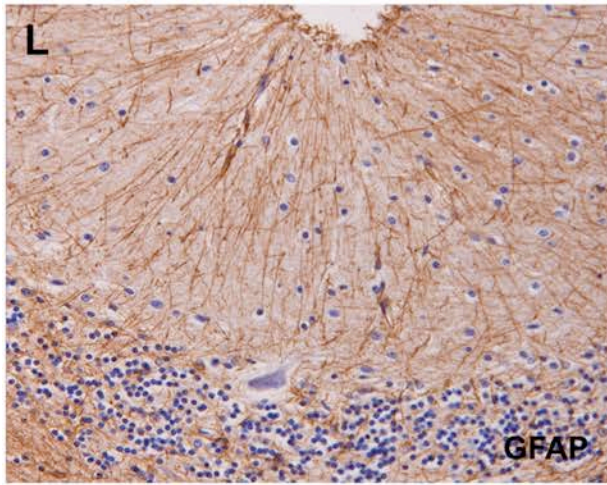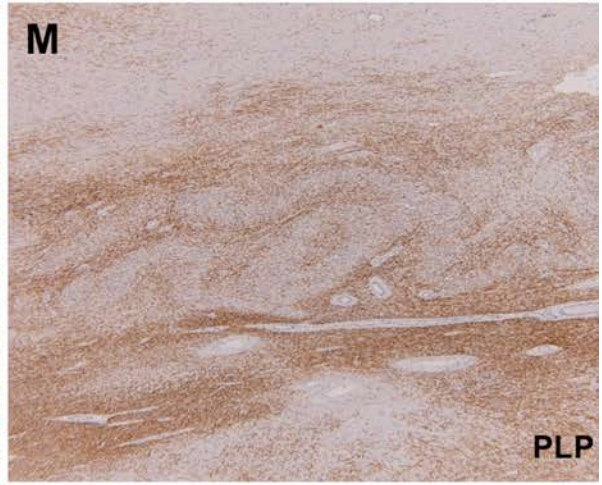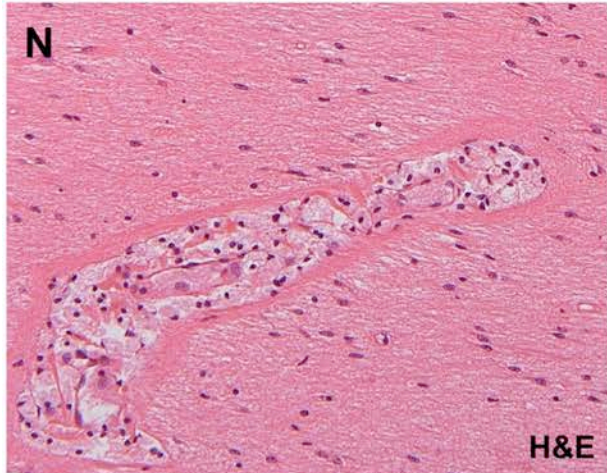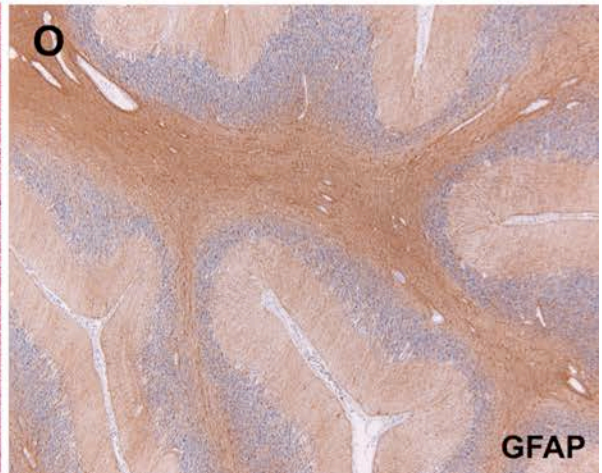



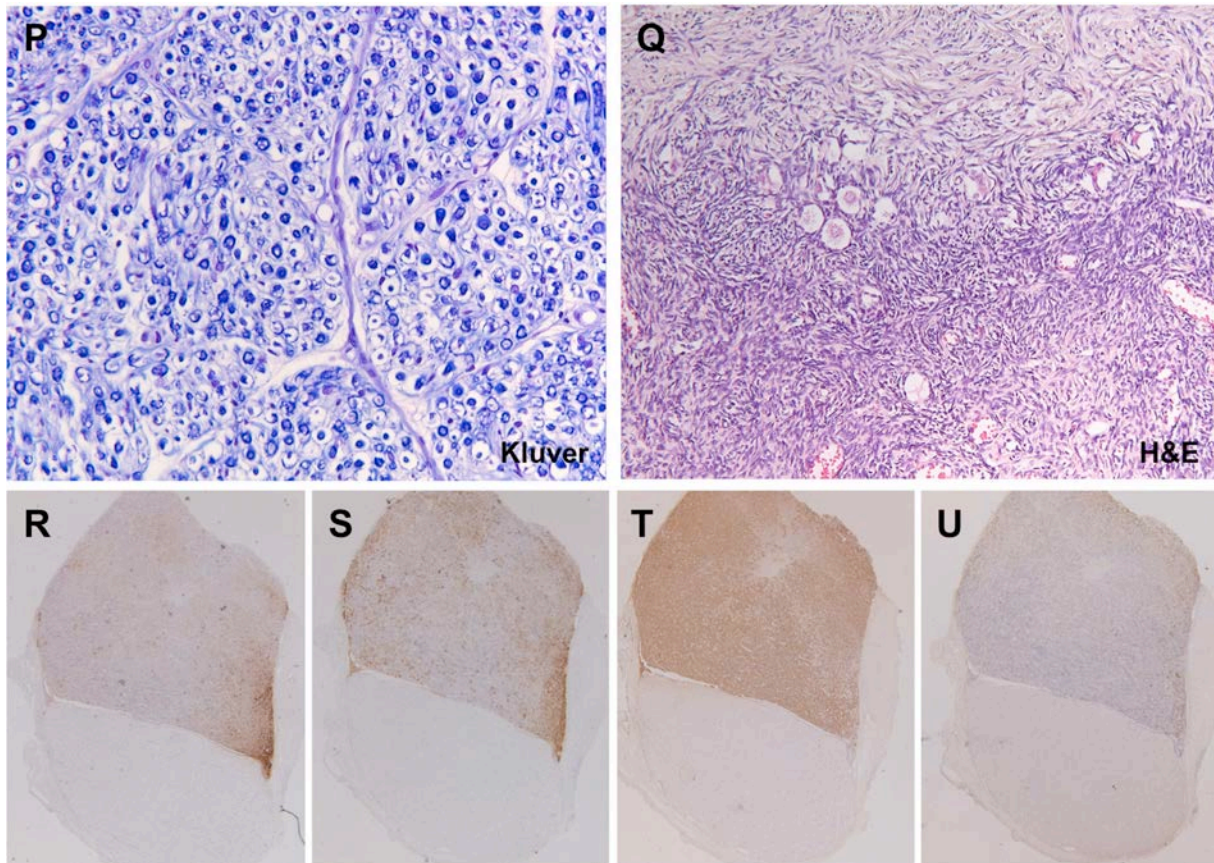

Whole mount of the second frontal gyrus stained for myelin basic protein (MBP) shows patchy lack of myelin extending to the U-fibers (A). In the centrum semiovale, the perivascular myelin is inconsistently better preserved in this proteolipid protein (PLP) stain (B). Myelin pallor is accompanied by reduced numbers of oligodendrocytes (C). Small axonal varicosities accumulating neurofilaments can be found in the relatively preserved white matter of the U-fibers, suggesting early secondary axonal degeneration (D). PAS-positive foamy macrophages cluster around small blood vessels indicating ongoing myelin breakdown (E). Activation of microglia is mild but CD68-expressing microglia cells are seen in close proximity to white matter oligodendrocytes (top) and cortical neurons (bottom) (F). The cortex is otherwise unaffected, without neuronal mineralization (G). No iron accumulation is seen in the globus pallidus (H).

Stain for proteolipid protein (PLP) shows patchy lack of myelin in the deep cerebellar white matter extending into the folia (A). The cerebellar cortex is mildly atrophic with some loss of granular neurons and, in places, Purkinje cells (B). Residual Purkinje cells have axonal and dendritic swellings accumulating neurofilaments (C), but the degree of reactive Bergmann gliosis is scanty (D). The myelin at the hilus of the dentate nucleus is relatively spared, correlating well with the MRI finding (E). Blood vessels are surrounded by foamy macrophages, suggesting ongoing myelin breakdown (F), and by a rim of reactive astrocytes (G). Original magnifications:

Semithin sections of the sural nerve stained with toluidine blue show mild loss of myelin (P). There are only a slightly reduced numbers of oocytes in the otherwise normal ovaries (Q). In the pituitary gland the immunoreactivity for FSH, LH, GH and prolactin is normal (R-U).

Original magnifications: (B) 50x; (C, G, H) 100x; (E) 200x; (D, F) 400x; (I) 12.5x; (J, K) 100x; (M, O) 25x; (L, N) 200x; (P) 200X; (Q) 100X; (R-U) 12.5X.

## References

1. Bekiesinska-Figatowska M, Mierzewska H, Kuczynska-Zardzewialy A, Szczepanik E, Obersztyn E. Hypomyelination, hypogonadotropic hypogonadism, hypodontia - First Polish patient. *Brain Dev* 2010; **32**: 574-78.
2. Bernard G, Chouery E, Putorti ML et al. Mutations of POLR3A Encoding a Catalytic Subunit of RNA Polymerase Pol III Cause a Recessive Hypomyelinating Leukodystrophy. *Am J Hum Genet* 2011; **89**: 415-23.
3. Daoud H, Tetreault M, Gibson W et al. Mutations in POLR3A and POLR3B are a major cause of hypomyelinating leukodystrophies with or without dental abnormalities and/or hypogonadotropic hypogonadism. *J Med Genet* 2013; **50**: 194-97.
4. Ozgen HM, Overweg-Plandsoen WC, Bleele-Pelk J, Besselaar PP, Hennekam RC. Cerebellar hypoplasia-endosteal sclerosis: a long term follow-up. *Am J Med Genet A* 2005; **134A**: 215-19.
5. Potic A, Brais B, Choquet K, Schiffmann R, Bernard G. 4H Syndrome With Late-Onset Growth Hormone Deficiency Caused by POLR3A Mutations. *Arch Neurol* 2012; **69**: 920-23.
6. Timmons M, Tsokos M, Asab MA et al. Peripheral and central hypomyelination with hypogonadotropic hypogonadism and hypodontia. *Neurology* 2006; **67**: 2066-69.
7. Vazquez-Lopez M, Ruiz-Martin Y, de Castro-Castro P, Garzo-Fernandez C, Martin-del Valle F, Marquez-de la Plata L. [Central hypomyelination, hypogonadotropic hypogonadism and hypodontia: a new leukodystrophy]. *Rev Neurol* 2008; **47**: 204-08.
8. Wolf NI, Harting I, Boltshauser E et al. Leukoencephalopathy with ataxia, hypodontia, and hypomyelination. *Neurology* 2005; **64**: 1461-64.
9. Wolf NI, Harting I, Innes AM et al. Ataxia, delayed dentition and hypomyelination: a novel leukoencephalopathy. *Neuropediatrics* 2007; **38**: 64-70.
